# Supplementary material
Source: Springer Nature journal article supplement (https://www.springermedizin.de/resource/supplementary/12883_2010_427_MOESM2_ESM.pdf/9455422)
Supplement: MOESM2 [file 9455422]

# BASELINE VISIT

CLINICAL AND ANTHROPOMETRIC DATA COLLECTION

EXTRA AND INTRACRANIAL DUPLEX ULTRASOUND STUDY

BLOOD SAMPLES COLLECTION: BIOBANK

NEUROPSYCHOLOGICAL ASSESMENT

SUBJECTS WITH ASIA

SUBJECTS WITHOUT ASIA

MRA CONFIRMATION

2 YEAR: DUPLEX AND NPS REASSESSMENT

FOLLOW-UP IN OUR CENTRE

FOLLOW-UP IN PERART STUDY

INCIDENT VASCULAR EVENTS AND VASCULAR DEATH

FOLLOW-UP (5 years)

MATCHED GROUP
